# Supplementary material for: Benefits, barriers and determinants of practicing yoga: A cross sectional study from Kathmandu, Nepal
Source: PubMed Central journal article supplement — J Ayurveda Integr Med. 2021 Feb 3;12(1):102–6. doi: 10.1016/j.jaim.2021.01.007 (PMC8039334; doi:10.1016/j.jaim.2021.01.007), 2021-02-03
Supplement: mmc1.pdf [file mmc1.pdf]

What factors influence practicing yoga?

Section A

Gender ..... Age (in years) .....

Annual income of your family (Rs)..... Family size .....

Education (in years) ..... Your height in cm..... Your weight in kg.....

Occupation (Please tick one only): Salaried job ... Business ... Other job...Unemployed ...

Do you smoke? .....

Do you drink alcoholic beverages? .....

Do any member in your family and/or close relatives have attended formal health related education? .....

Are you a member of any social groups or organizations? .....

Do you have internet access at home?.....

Please rate your overall health status (in a scale of 1 to 10 where 10 means very healthy and 1 means very unhealthy) .....

Section B

Have you ever participated in yoga training? .....

Do you do/practice yoga? .....

If yes, how many types of yoga do you practice? .....

Since how many years are you practicing yoga? .....

Section C

What are the benefits you have achieved by practicing yoga?  
.....  
.....

Have you experienced any problems associated with yoga practicing?  
.....  
.....

(For those not practicing yoga) Could you please tell me why you are not practicing yoga?  
.....  
.....

(For those who practice yoga) What motivates you to practice yoga?  
.....  
.....

***Thank you for participating in this survey***
